# Supplementary material for: A pyrylium salt-based fluorescent probe for the highly sensitive detection of methylamine vapour
Source: Royal Society of Chemistry journal article supplement (doi:10.1039/d2an00911k), 2022-01-01
Supplement: d2an00911k1.pdf [file d2an00911k1.pdf]

## Electronic Supporting Information

### A pyrylium salt-based fluorescent probe for the highly sensitive detection of methylamine vapour

Wenzhu Yin, <sup>\*a,c</sup> Hongjin Wang, <sup>b</sup> Bihua Deng, <sup>a,c</sup> Fang Ma, <sup>a,c</sup> Jinqiu Zhang, <sup>a,c</sup>  
Mingxu Zhou <sup>a,c</sup>, Haiyang Wang <sup>a,c</sup> and Yu Lu <sup>\*a,c</sup>

<sup>a</sup>Institute of Veterinary Immunology & Engineering, National Research Center of Engineering and Technology for Veterinary Biologicals, Jiangsu Key Laboratory for Food Quality and Safety-State Key Laboratory Cultivation Base, Ministry of Science and Technology, Jiangsu Academy of Agricultural Sciences, Nanjing 210014, P. R. China; <sup>b</sup>College of Chemistry and Environmental Science, YiLi Normal University, Yining 835000, PR China; <sup>c</sup>Jiangsu Co-innovation Center for Prevention and Control of Important Animal Infectious and Zoonoses, Yangzhou, 225009, P. R. China.

#### Corresponding Author

Wenzhu Yin — <sup>a</sup>Institute of Veterinary Immunology & Engineering, National Research Center of Engineering and Technology for Veterinary Biologicals, Jiangsu Key Laboratory for Food Quality and Safety-State Key Laboratory Cultivation Base, Ministry of Science and Technology, Jiangsu Academy of Agricultural Sciences, Nanjing 210014, P. R. China; <sup>c</sup>Jiangsu Co-innovation Center for Prevention and Control of Important Animal Infectious and Zoonoses, Yangzhou, 225009, P. R. China; E-mail: [m18805157895@163.com](mailto:m18805157895@163.com)

Yu Lu — <sup>a</sup>Institute of Veterinary Immunology & Engineering, National Research Center of Engineering and Technology for Veterinary Biologicals, Jiangsu Key Laboratory for Food Quality and Safety-State Key Laboratory Cultivation Base, Ministry of Science and Technology, Jiangsu Academy of Agricultural Sciences, Nanjing 210014, P. R. China; <sup>c</sup>Jiangsu Co-innovation Center for Prevention and Control of Important Animal Infectious and Zoonoses, Yangzhou, 225009, P. R. China; E-mail: [luyu201710@163.com](mailto:luyu201710@163.com)

## Contents

|                                                                                                                                                                                      |     |
|--------------------------------------------------------------------------------------------------------------------------------------------------------------------------------------|-----|
| <b>Figure S1.</b> The absorption spectra of MTPY (5 $\mu$ M) in acetonitrile at 0 and 48 h                                                                                           | p3  |
| <b>Figure S2.</b> UV-Visable spectra for measure of molar extinction coefficient t                                                                                                   | p3  |
| <b>Figure S3.</b> The time dependence absorption spectra of MTPY (5 $\mu$ M) with MA in DMSO-PBS buffer solution (10 mM, pH=7.4, 5/95, v/v) from 0 and 75 minutes at 25 $^{\circ}$ C | p3  |
| <b>Figure S4.</b> The time-dependent fluorescence intensity of MTPY (5 $\mu$ M) toward MA (10 ppm) in PBS. (10 mM, pH 7.4, containing 5% DMSO, 0-120 min, 25 $^{\circ}$ C)           | p4  |
| <b>Figure S5.</b> Photographs of TLC strip loaded with MTPY under daylight and UV light (365 nm) with or without different amine vapors                                              | p4  |
| <b>Figure S6.</b> ESI-MS of MTPY + MA                                                                                                                                                | p5  |
| <b>Figure S7.</b> ESI-MS of MTPY + NH <sub>3</sub>                                                                                                                                   | p5  |
| <b>Figure S8.</b> ESI-MS of MTPY + N <sub>2</sub> H <sub>4</sub>                                                                                                                     | p6  |
| <b>Figure S9.</b> ESI-MS of MTPY + isopropylamine                                                                                                                                    | p6  |
| <b>Figure S10.</b> ESI-MS of MTPY + 4-(2-aminoethyl)morpholine                                                                                                                       | p7  |
| <b>Figure S11.</b> ESI-MS of MTPY + AP                                                                                                                                               | p7  |
| <b>Figure S12.</b> ESI-MS of MTPY+Lys                                                                                                                                                | p8  |
| <b>Figure S13.</b> Cell viability experiments by standard CCK-8 assay using RAW264.7 cells for MTPY                                                                                  | p8  |
| <b>Figure S14.</b> <sup>1</sup> H NMR of MTPY                                                                                                                                        | p9  |
| <b>Figure S15.</b> <sup>13</sup> C NMR of MTPY                                                                                                                                       | p9  |
| <b>Figure S16.</b> ESI-HRMS spectrum of MTPY                                                                                                                                         | p10 |
| <b>Table S1.</b> Comparison of the limit of detection for MA                                                                                                                         | p10 |
| <b>Cell culture and <i>in vitro</i> cytotoxicity by CCK-8 assay</b>                                                                                                                  | p11 |
|                                                                                                                                                                                      | p11 |

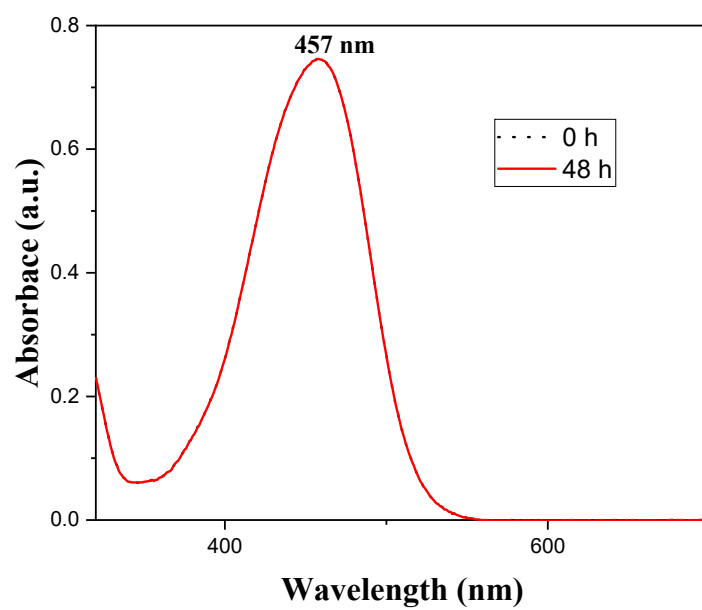

**Fig. S1.** The absorption spectra of MTPY (5  $\mu\text{M}$ ) in acetonitrile at 0 and 48 h

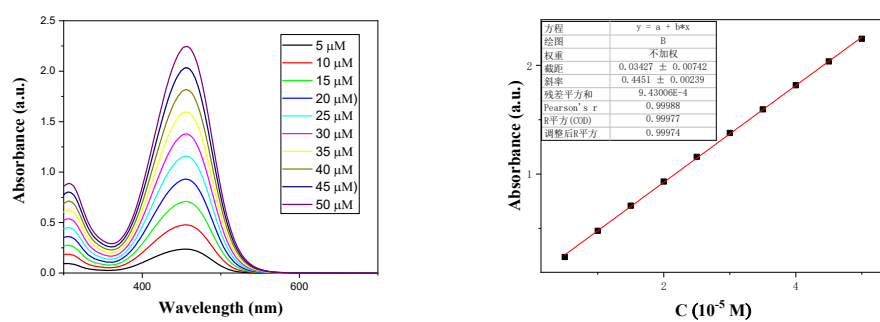

**Figure S2.** UV-Visible spectra for measure of molar extinction coefficient

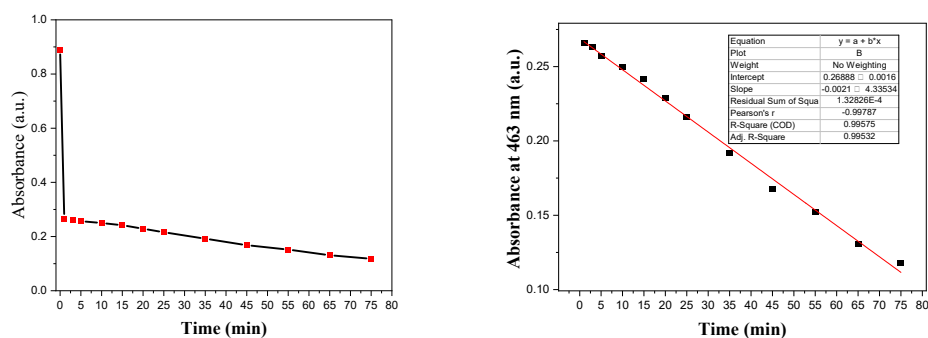

**Figure S3.** The time dependence absorption spectra of MTPY (5  $\mu$ M) with MA in DMSO-PBS buffer solution (10 mM, pH=7.4, 5/95, v/v) from 0 and 75 minutes at 25 °C

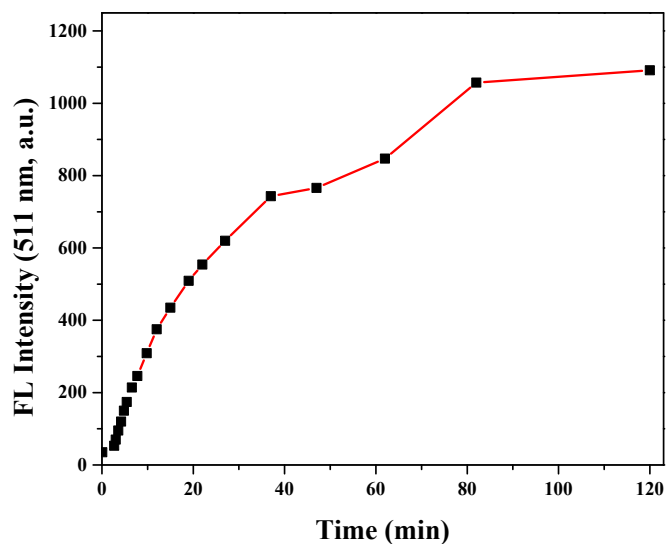

**Figure S4.** The time-dependent fluorescence intensity of MTPY (5  $\mu$ M) toward MA (10 ppm) in PBS. (10 mM, pH 7.4, containing 5% DMSO, 0-120 min, 25 °C)

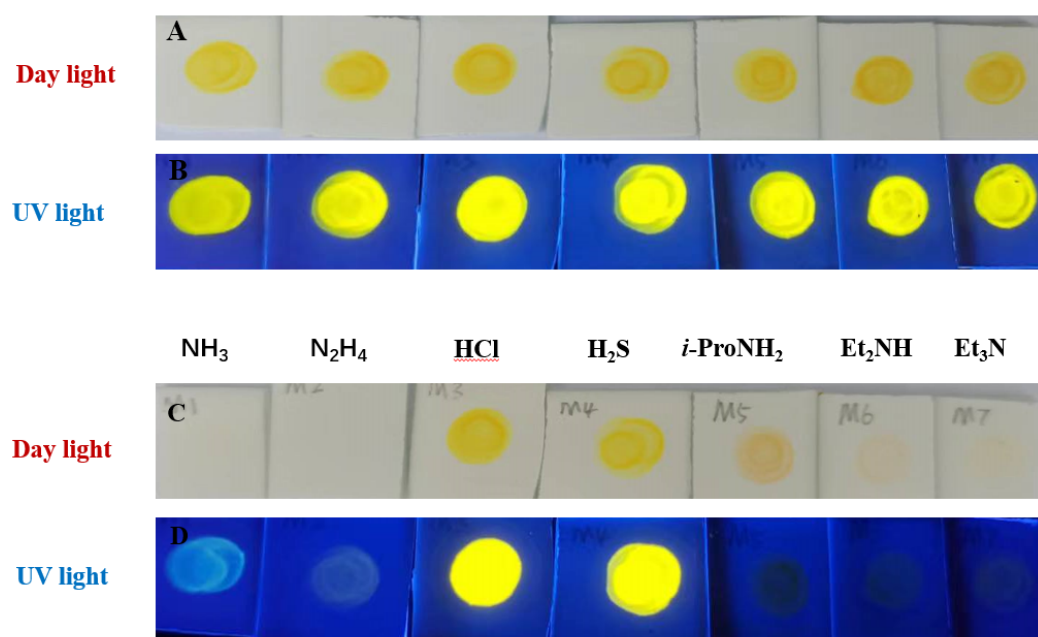

**Figure S5.** Photographs of TLC strip loaded with MTPY under daylight and UV light (365 nm) with or without different amine vapors

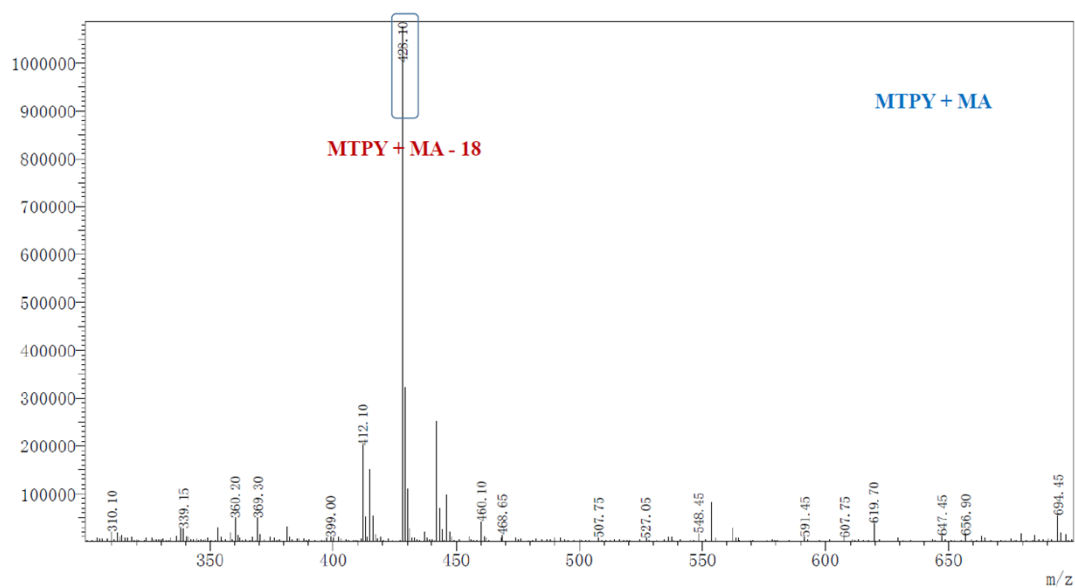

**Figure S6.** ESI-MS of MTPY+MA

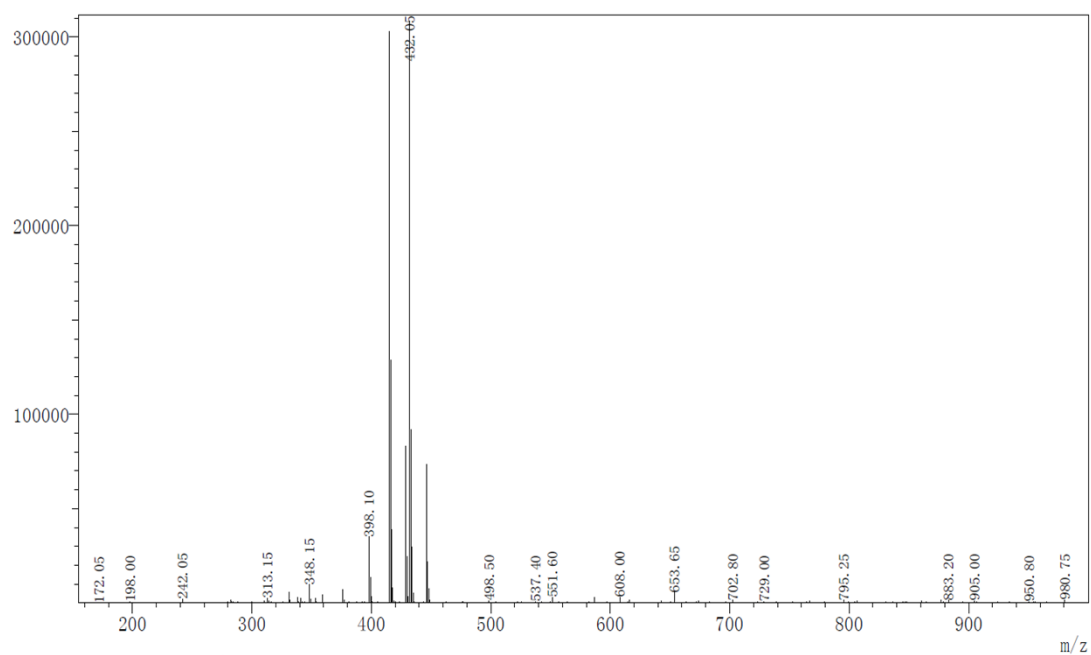

**Figure S7.** ESI-MS of MTPY+NH<sub>3</sub>

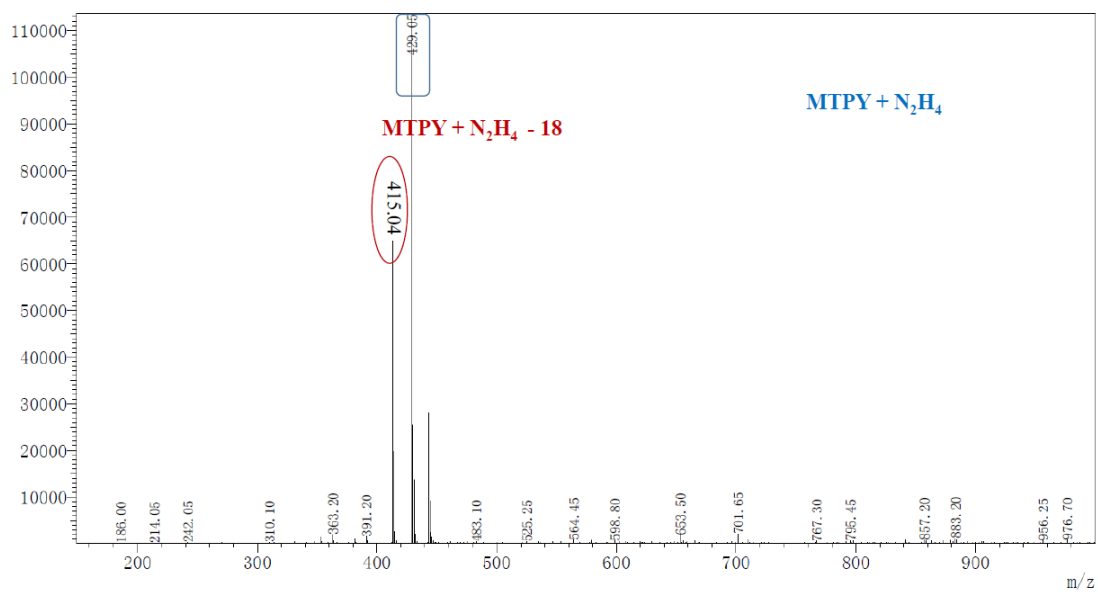

**Figure S8.** ESI-MS of MTPY+N<sub>2</sub>H<sub>4</sub>

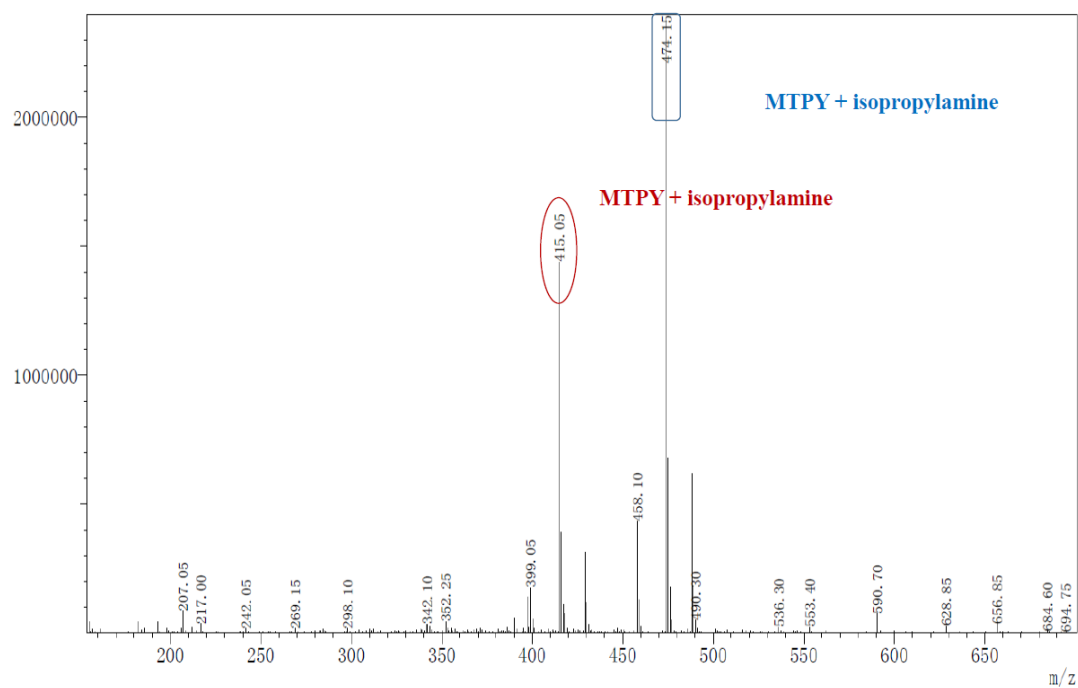

**Figure S9.** ESI-MS of MTPY+isopropylamine

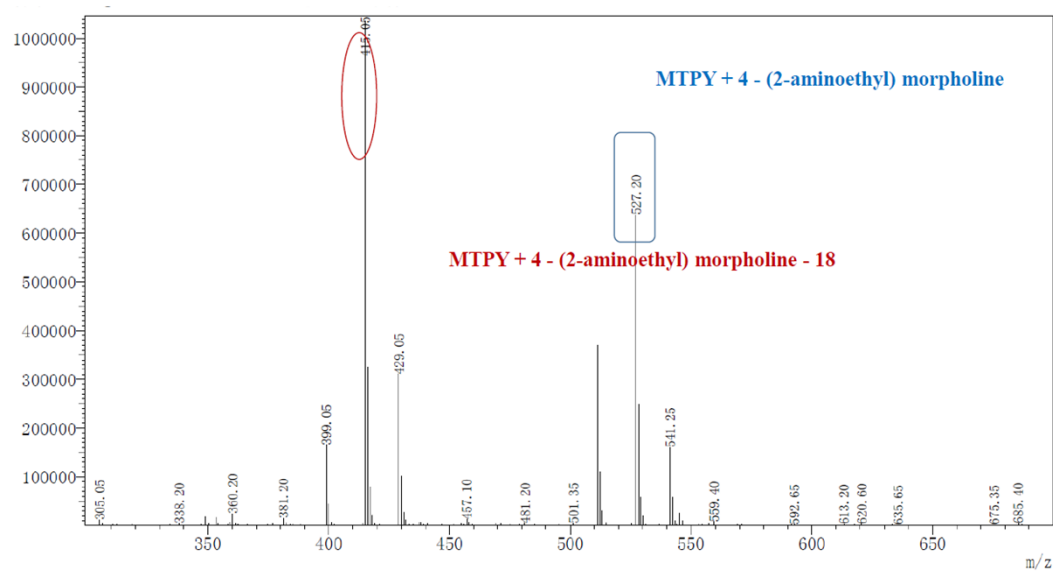

**Figure S10.** ESI-MS of MTPY+4-(2-aminoethyl)morpholine

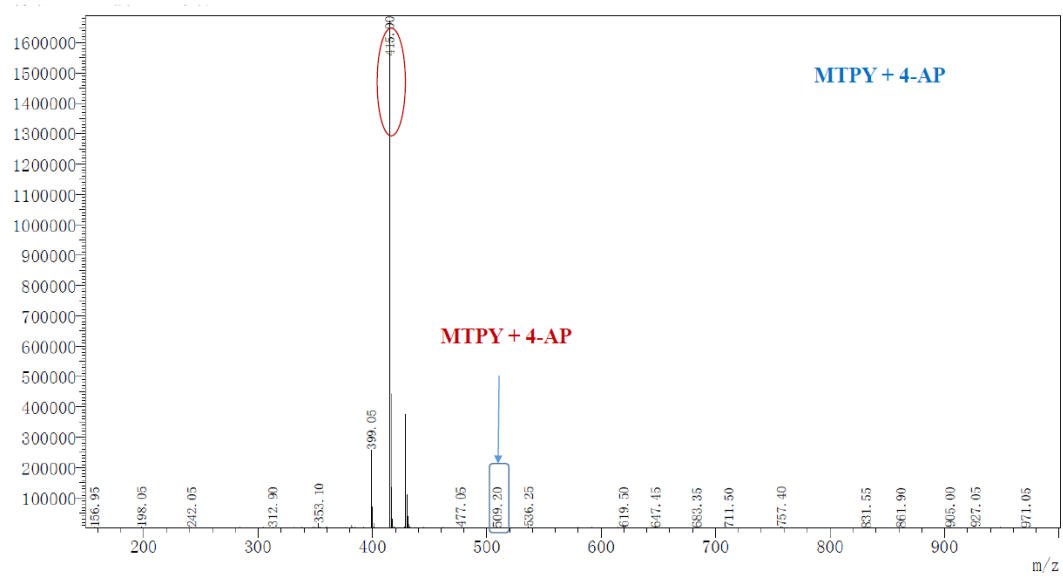

**Figure S11. ESI-MS of MTPY+AP**

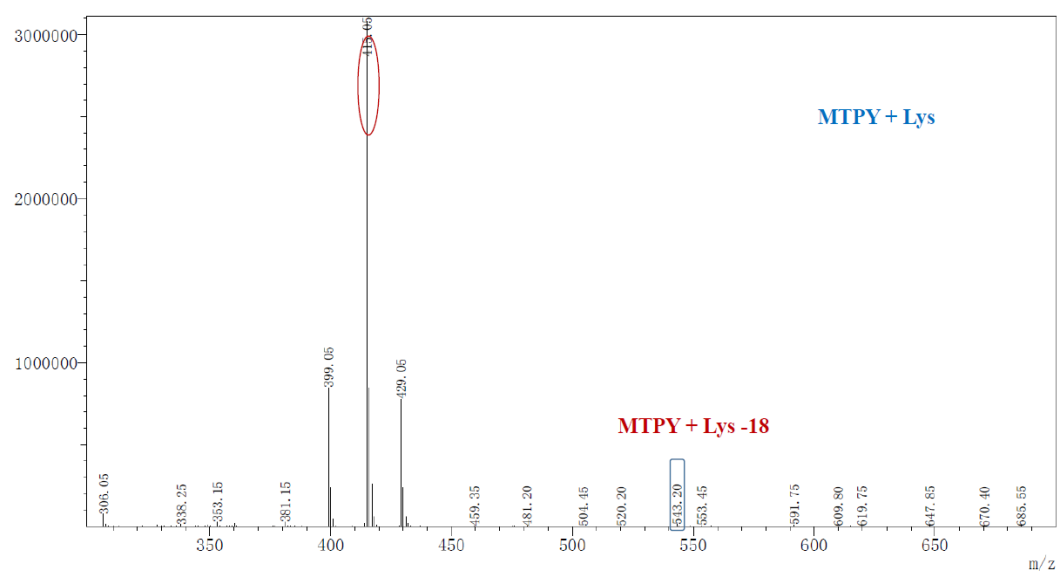

**Figure S12. ESI-MS of MTPY+Lys**

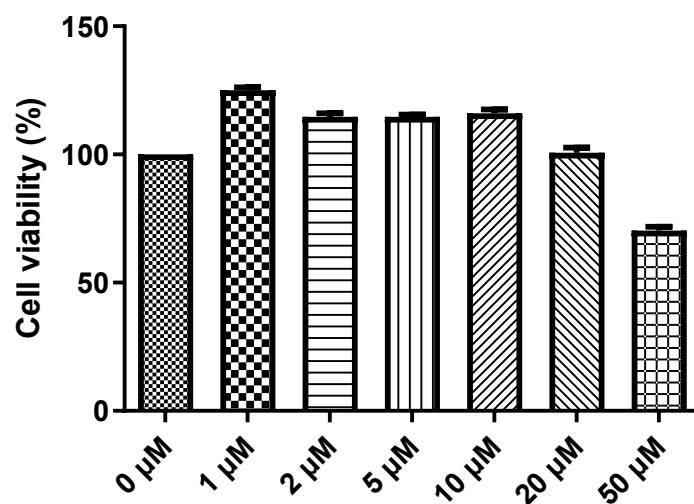

**Figure S13.** Cell viability experiments by standard CCK-8 assay using RAW264.7 cells for MTPY

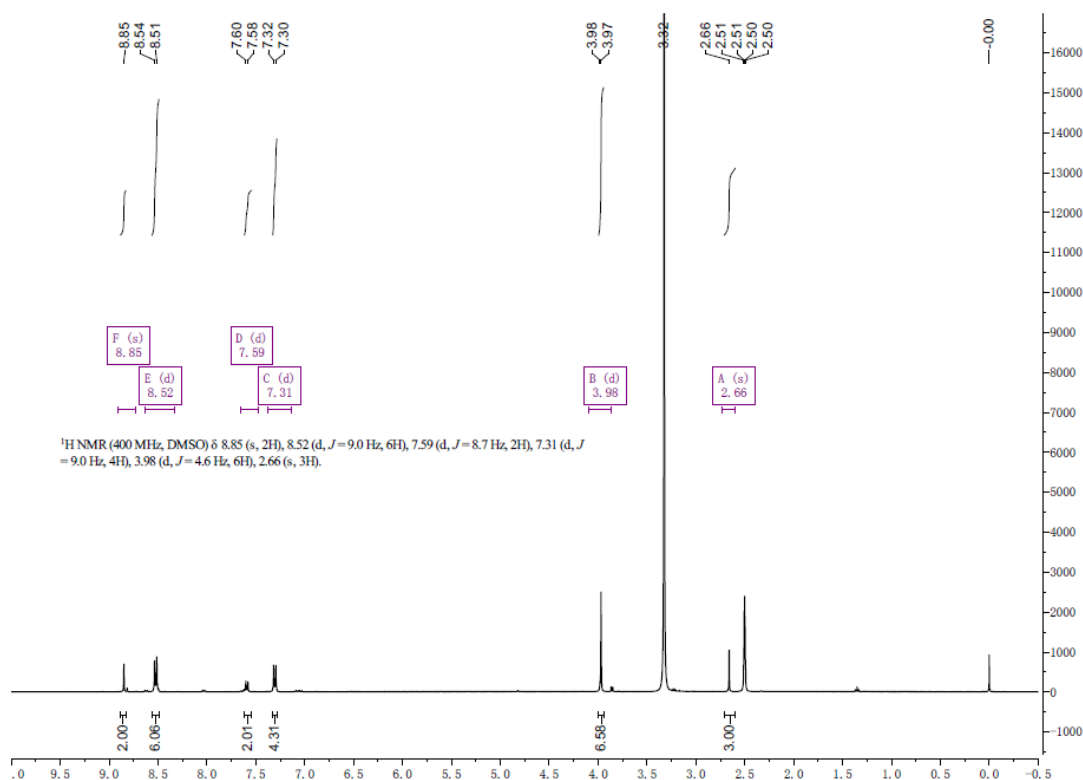

**Figure S14.** <sup>1</sup>H NMR of MTPY

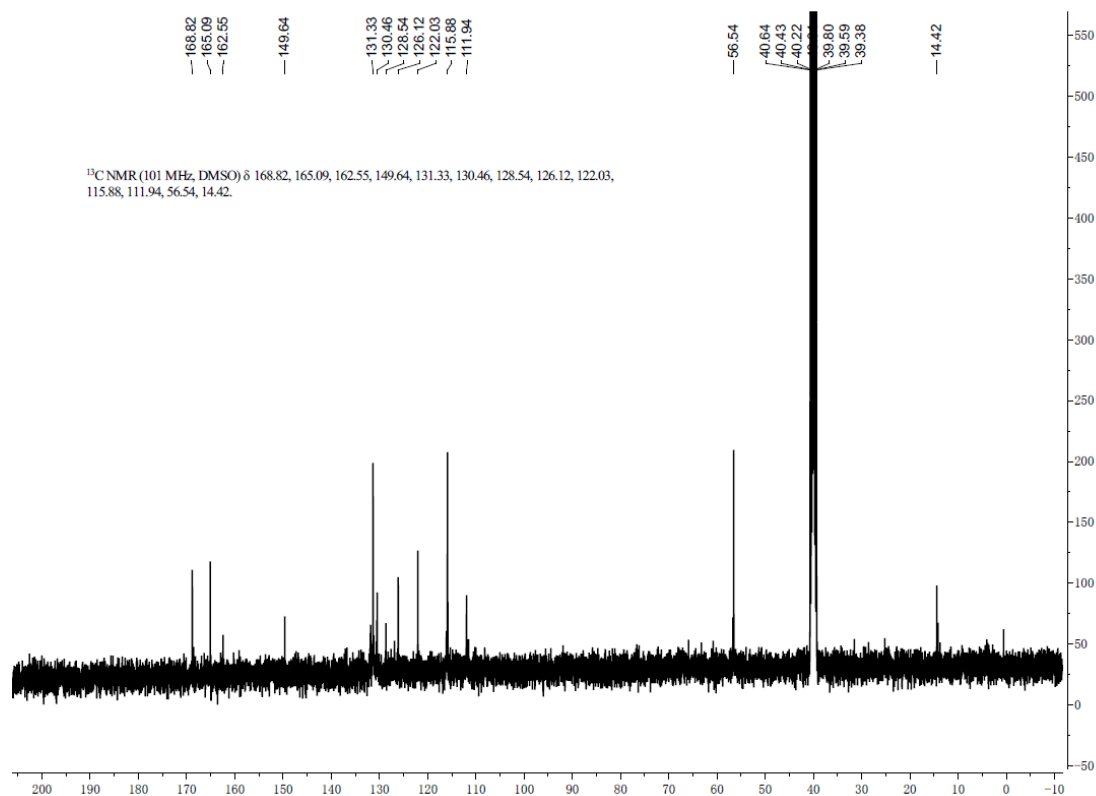

**Figure S15.**  $^{13}\text{C}$  NMR of MTPY

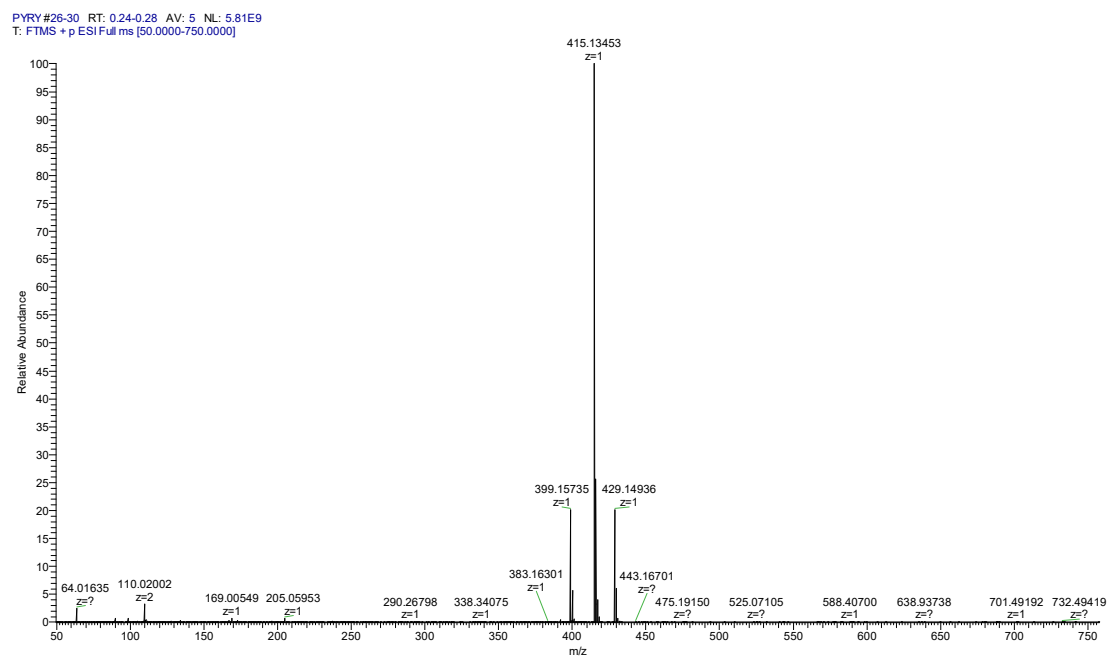

**Figure S16.** ESI-HRMS of MTPY

**Table S1.** Comparison of the limit of detection for MA

|      | Reference      | linear range (ppm) | LOD (ppm) |
|------|----------------|--------------------|-----------|
|      | 1 <sup>1</sup> | 5-200              | 0.8       |
|      | 2 <sup>2</sup> | -                  | 0.1       |
|      | 3 <sup>3</sup> | 1.0-95             | 0.07      |
|      | 4 <sup>4</sup> | 1-100              | 1         |
|      | 5 <sup>5</sup> | -                  | 0.87      |
|      | 6 <sup>6</sup> | -                  | 0.1       |
| Cell | This work      | 0.1-2              | 0.0026    |

### culture and in vitro cytotoxicity by CCK-8 assay

The Raw264.7 cells were cultured in Dulbecco's Modified Eagle's medium (DMEM) containing 10% fetal bovine serum, 1% penicillin, and 1% amphotericin, under the conditions of 5% CO<sub>2</sub>, and 37 °C. The cells were seeded into 96-well plates and allowed to adhere for 24 h. Then, a series of diluted MTPY with different concentrations were added to the wells. After incubation for 24 h, the medium with diluted MTPY was discarded and the cells were washed thrice with PBS. Then, 10 µL CCK-8 agent was added into each well. Further incubating for 4 h, the medium was again removed and 150 µL of dimethyl sulfoxide was added. Before the final measurement, the mixture was subjected to 10 min vibration to ensure the complete dissolution of the purple crystals. Finally, a microplate reader (Epoch, BioTek, USA) was used to measure the absorption of the solution at 450 nm.

### Reference

1. G. Huang, Y. Zhou, F. Li, X. Tan, Z. Cai, D. Luo, T. Chen and M. Zhang, *Sensors and Actuators B: Chemical*, 2021, **347**, 130618.
2. I. Ueta, Y. Nakamura, H. Fujikawa, K. Fujimura and Y. Saito, *Chromatographia*, 2019, **82**, 317-323.
3. S.-M. Lu, Y.-Y. Peng, Y.-L. Ying and Y.-T. Long, *Analytical Chemistry*, 2020, **92**, 5621-5644.
4. J. Sarfraz, J. Peltonen and P. Ihalainen, *Thin Solid Films*, 2019, **669**, 544-550.
5. Y. H. Liu, X. Xu, H. F. Lu and B. Yan, *Journal of Materials Chemistry C*, 2022, **10**, 1212-1219.
6. R. Liu, Y. Liu, S. Yu, C. Yang, Z. Li and G. Li, *ACS Appl. Mater. Interfaces*, 2019, **11**, 1713-1722.
